# Supplementary material for: Identification of Markers Associated with Wheat Dwarf Virus (WDV) Tolerance/Resistance in Barley (<em>Hordeum vulgare ssp. vulgare</em>) Using Genome Wide Association Studies
Source: Preprints.org preprint supplement (doi:10.20944/preprints202305.0943.v1), 2023-05-12
Supplement: Supplementary file 2 [file supplementary]

## Sheet: Table S1
	Table S1. Plant material. Information about country of the 191 genotypes used in this study.
	Geno name	Country	Testd in year
	HOR 1000	Turkey	2016
	HOR 1008	Albanien	2016
	HOR 1061	Turkey	2016
	HOR 1065	Turkey	2016
	HOR 1067	Turkey	2016
	HOR 1069	Turkey	2016
	HOR 1070	Turkey	2016
	HOR 1072	Turkey	2016
	HOR 1081	Turkey	2016
	HOR 1321	Afghanistan	2016
	HOR 1359	Iran	2016
	HOR 2240	Ungarn	2016
	HOR 2467	Iran	2016
	HOR 3096	Sowjetunion	2016
	HOR 3235	*Sowjetunion	2016
	HOR 3347	Ukraine	2016
	HOR 3366	Russia	2016
	HOR 3368	Russia	2016
	HOR 3385	Russia	2016
	HOR 3393	Russia	2016
	HOR 3395	Russia	2016
	HOR 3396	Russia	2016
	HOR 3471	Russia	2016 and 2017
	HOR 3474	Russia	2016
	HOR 3476	Ungarn	2016
	HOR 4106	Afghanistan	2016
	HOR 4244	Yugoslavia	2016
	HOR 4538	Sweden	2016
	HOR 4541	Sweden	2016
	HOR 4542	Sweden	2016
	HOR 4688	Ungarn	2016
	HOR 4689	Ungarn	2016
	HOR 4909	Bulgarien	2016
	HOR 6933	Korea	2016
	HOR 6955	Iraq	2016
	HOR 8274	Georgien	2016
	HOR 8907	Iraq	2016
	HOR 10590	Georgien	2016
	HOR 11209	Ungarn	2016
	HOR 11312	Albanien	2016
	HOR 11533	China	2016
	HOR 11535	China	2016 and 2017
	HOR 11978	Afghanistan	2016
	HOR 11979	Afghanistan	2016 and 2017
	HOR 13161	Russia	2016
	HOR 13792	Jordanien	2016
	HOR 13795	Jordanien	2016
	HOR 13893	Ethiopia	2016
	HOR 13894	Ethiopia	2016
	HOR 13920	Ethiopia	2016
	HOR 15506	Iran	2016
	HOR 17328	Iran	2016
	HOR 17377	Iran	2016
	HOR 17440	Iran	2016
	HOR 17788	Ethiopia	2016
	HOR 18298	Iran	2016 and 2017
	HOR 19195	Iran	2016
	HOR 19788	Iran	2016
	HOR 19803	Syria	2016
	HOR 19819	Syria	2016
	HOR 20118	Syria	2016
	HOR 20120	Syria	2016
	HOR 20122	Syria	2016
	HOR 20123	Syria	2016
	HOR 20132	Syria	2016
	HOR 20142	Syria	2016
	HOR 20156	Syria	2016
	HOR 20161	Syria	2016
	HOR 3263	Russia	2016 and 2017
	HOR 3298	Iran	2016 and 2017
	HOR 1076	Turkey	2016 and 2017
	HOR 1077	Turkey	2016 and 2017
	HOR 1080	Turkey	2016 and 2017
	HOR 3216	*Sowjetunion	2016 and 2017
	HOR 17910	Iran	2016 and 2017
	HOR 25	*Sowjetunion	2016 and 2017
	HOR 27	Rumänien	2016 and 2017
	HOR 401	Turkey	2016 and 2017
	HOR 14506	Iran	2016 and 2017
	HOR 2295	Ungarn	2016 and 2017
	HOR 3482	Yugoslavia	2016 and 2017
	HOR 4219	Afghanistan	2016 and 2017
	HOR 11541	China	2016 and 2017
	HOR 13904	Ethiopia	2016 and 2017
	HOR 21	unknown	2016 and 2017
	HOR 402	unknown	2016 and 2017
	HOR 1653	unknown	2016 and 2017
	HOR 3072	unknown	2016 and 2017
	HOR 3334	unknown	2016 and 2017
	HOR 8273	unknown	2016 and 2017
	HOR 18866	unknown	2016 and 2017
	HOR 3311	Ukraine	2016 and 2017
	Rubina	unknown	2016 and 2017
	Post	unknown	2016 and 2017
	BAZ-1L-073	unknown	2017
	BAZ-3L-062	unknown	2017
	Lignee527/Chn-01/Lignee527	unknown	2017
	Skorohod/ViringaS	unknown	2017
	Alanda//Lignee527/Arar/3/Alanda01	unknown	2017
	Coho/Zy//Masurka/3/Alanda/4/Lignee527/NK1272	unknown	2017
	Arar/Lignee527//Arar/PI386540	unknown	2017
	Alanda/Lignee527/Arar/3/Atahualpa	unknown	2017
	K-019	unknown	2017
	NY6005-18/OWB70173-2H-4H//NY6005-19/J126/3	unknown	2017
	Apha/Cum/3/Igri/MOB2639//P13161/Igri	unknown	2017
	AZE-Nagorno-Karabakh-ICB-123532	unknown	2017
	5111/YEA605.5//Alger/Ceres362-1-1	unknown	2017
	24569=(80-5138/Aths)	unknown	2017
	ArabiAbiad/Arar/H.spont.41-5/Tadmor	unknown	2017
	WI2291/Tadmor	unknown	2017
	80-5024/F3BulkHip//Lignee131	unknown	2017
	Lignee131/3/4679/105/YEA168-4	unknown	2017
	K-019	unknown	2017
	1937222ORW-10	unknown	2017
	Radical/Pervenets	unknown	2017
	K-019	unknown	2017
	Radical/Pervenets	unknown	2017
	Alpha/Cum/3/Igri/MOB2639//P13161/Igri	unknown	2017
	BF891M-621/Teran78	unknown	2017
	Mal/OWB753328-5H//11840-76/3/Quinn	unknown	2017
	F2//Radical/Karat/3/Radical/4/Xemus	unknown	2017
	CitaS/3/Boy*2/3*Surb//CI12225-2D/4/SgdoS/3	unknown	2017
	OK84817//K-281/Skorokhod	unknown	2017
	K-305-2/Xemus	unknown	2017
	Paoli/FL7124RA36//Henry/3/VA75-42-55	unknown	2017
	Roho//Alger/Ceres362-1-1/3/Alpha/Durra	unknown	2017
	WI-2/Tadmor	unknown	2017
	Rhn-03/Carbo	unknown	2017
	Avt/Attiki/M-Att-73-337-1/3/Aths/Lignee686/4/Shege	unknown	2017
	Waveney/3/Moroc9-75//H.spont.41-5/Tadmor	unknown	2017
	Alpha/Durra//Antares/Ky63-1294/3/Arta	unknown	2017
	Arar/Lignee527//Alanda	unknown	2017
	Arbayan/NK1272/6/CI01021/4/CM67/U.Sask.1800//Pro/CM67/3/DL70/5/Nacha2	unknown	2017
	Gloria'S'/Copal'S'//As46/Aths/3/Rhn-03	unknown	2017
	Arbayan-01//M6/Robur-35-6-3/3/Mammut//Gloria'S/Come'S	unknown	2017
	Arar/Lignee527/3/Mammut//Gloria'S/Come'S	unknown	2017
	Arbayan/NK1272/4/Arar/3/Mari/Aths*2//M-Att-73-337-1/5/Mammut//Gloria'S/Come'S	unknown	2017
	HOR 4553	china	2017
	Zanbaka/4/Arar/H.spont.19-15//Hml/3/H.spont.41-1/Tadmor/5/Zanbakian	unknown	2017
	Tadmor//Roho/Mazurka/3/Tadmor	unknown	2017
	PI 143454	Iran	2017
	CIho 7079	Iran	2017
	CIho 2426	China	2017
	CIho 1279	United States	2017
	PI 141424	Iran	2017
	CIho 7081	Iran	2017
	CIho 2462	China	2017
	CIho 2461	China	2017
	CIho 2458	China	2017
	CIho 2420	United States	2017
	CIho 2269	China	2017
	CIho 2033	United States	2017
	CIho 978	United States	2017
	CIho 583	Canada	2017
	CIho 554	United States	2017
	CIho 534	United States	2017
	CIho 170	Canada	2017
	PI 584953	China	2017
	PI 584967	China	2017
	PI 584961	China	2017
	CIho 2465	China	2017
	CIho 662	United States	2017
	PI 225135	Iran	2017
	PI 223377	Iran	2017
	PI 223376	Iran	2017
	PI 222801	Iran	2017
	PI 222800	Iran	2017
	PI 202821	Iran	2017
	PI 141422	Iran	2017
	PI 141421	Iran	2017
	PI 138719	Iran	2017
	PI 47541	Iran	2017
	CIho 11172	Canada	2017
	PI 584981	China	2017
	CIho 2242	United States	2017
	CIho 2159	United States	2017
	CIho 3545	United States	2017
	CIho 5072	Canada	2017
	CIho 10532	Canada	2017
	CIho 3543	United States	2017
	CIho 10435	Canada	2017
	CIho 10098	Canada	2017
	CIho 10031	Canada	2017
	CIho 12251	Canada	2017
	CIho 10096	Canada	2017
	CIho 10097	Canada	2017
	CIho 11360	Canada	2017
	CIho 10032	Canada	2017
	PI 584968	China	2017
	PI 584947	China	2017
	Tonic	unknown	2017

## Sheet: Table S2
	Table S2. Trait performance of all investigated barley genotypes.
	Trait	Treatmenta	Nb	Meanc	Minimumd	Maximumd	Sde	CVf
	ELISA-60	I-variant	3444	0.224569	-0.03	1.84	0.509252	226.769
	Total grain weight	I-variant	370	11.2524	0	287.42	31.5802	280.653
		C-variant	457	162.051	2.22	781.68	101.461	62.6105
	Plant Height	I-variant	1037	59.5966	0.67	159	42.5302	71.3635
		C-variant	2496	116.342	49	224	20.3992	17.5338
	Number of ears per plant	I-variant	1045	6.59904	0	52	8.3821	127.02
		C-variant	2490	17.7711	1	117	11.3864	64.0725
	Thousand grain weight	I-variant	350	25.604	5	48.3146	8.71083	34.0214
		C-variant	457	43.0167	24.3866	64.8276	7.69338	17.8846
	a Treatment: infected (I-variant) and control (C- Variant)
	b Number of observations
	c Mean value
	d Maximum and Minimum
	e Standard deviation
	f Coefficient of variation (in %)

## Sheet:  Table S3
	Table S3. List of all common identified significant (LOD>3) markers among two or three used methods for all measured traits.
	Method	Trait	Identified SNP	Chromosome	Position	P.value	LOD
	TASSEL	ELISA-60	JHI-Hv50k-2016-59853	2	1728375	8.514e-05	4.06987
	FARMCPU	ELISA-60	JHI-Hv50k-2016-59853	2	1728375	8.44877e-05	4.07321
	GAPIT	ELISA-60	JHI-Hv50k-2016-92202	2	272501172	0.000762973	3.11749
	TASSEL	ELISA-60	JHI-Hv50k-2016-92202	2	272501172	0.00037567	3.42519
	GAPIT	ELISA-60	SCRI_RS_208799	2	283783712	0.000472239	3.32584
	TASSEL	ELISA-60	SCRI_RS_208799	2	283783712	0.00031546	3.50106
	GAPIT	ELISA-60	JHI-Hv50k-2016-115026	2	614382128	0.000888174	3.0515
	TASSEL	ELISA-60	JHI-Hv50k-2016-115026	2	614382128	0.00078035	3.10771
	TASSEL	ELISA-60	JHI-Hv50k-2016-202418	3	561475004	0.00098419	3.00692
	FARMCPU	ELISA-60	JHI-Hv50k-2016-202418	3	561475004	0.000599211	3.22242
	GAPIT	ELISA-60	JHI-Hv50k-2016-202869	3	562689328	0.000313696	3.50349
	TASSEL	ELISA-60	JHI-Hv50k-2016-202869	3	562689328	0.00025898	3.58673
	GAPIT	ELISA-60	JHI-Hv50k-2016-202912	3	562758917	0.000330317	3.48107
	TASSEL	ELISA-60	JHI-Hv50k-2016-202912	3	562758917	0.00025757	3.5891
	FARMCPU	ELISA-60	JHI-Hv50k-2016-202912	3	562758917	0.000222911	3.65187
	TASSEL	ELISA-60	JHI-Hv50k-2016-225369	3	625468601	0.00012531	3.90201
	FARMCPU	ELISA-60	JHI-Hv50k-2016-225369	3	625468601	1.55517e-05	4.80822
	GAPIT	ELISA-60	JHI-Hv50k-2016-285193	5	20892091	0.000191369	3.71813
	TASSEL	ELISA-60	JHI-Hv50k-2016-285193	5	20892091	0.00023897	3.62166
	TASSEL	ELISA-60	JHI-Hv50k-2016-356761	5	580791106	0.00017961	3.74567
	FARMCPU	ELISA-60	JHI-Hv50k-2016-356761	5	580791106	0.000926249	3.03327
	GAPIT	ELISA-60	SCRI_RS_236959	6	144900405	0.000470264	3.32766
	FARMCPU	ELISA-60	SCRI_RS_236959	6	144900405	5.28007e-05	4.27736
	GAPIT	ELISA-60	JHI-Hv50k-2016-509416	7	616471490	0.000232426	3.63371
	FARMCPU	ELISA-60	JHI-Hv50k-2016-509416	7	616471490	1.57085e-06	5.80386
	GAPIT	Relative total grain weight	JHI-Hv50k-2016-135698	2	654445805	0.00089971	3.0459
	FARMCPU	Relative total grain weight	JHI-Hv50k-2016-135698	2	654445805	7.12805e-05	4.14703
	TASEEL	Relative total grain weight	JHI-Hv50k-2016-195152	3	528695155	9.3548e-05	4.02897
	FARMCPU	Relative total grain weight	JHI-Hv50k-2016-195152	3	528695155	0.000731477	3.1358
	GAPIT	Relative total grain weight	JHI-Hv50k-2016-196649	3	534052013	6.7799e-05	4.16878
	TASEEL	Relative total grain weight	JHI-Hv50k-2016-196649	3	534052013	0.00077376	3.11139
	FARMCPU	Relative total grain weight	JHI-Hv50k-2016-196649	3	534052013	2.76198e-06	5.55878
	GAPIT	Relative total grain weight	JHI-Hv50k-2016-254310	4	539188378	0.000936751	3.02838
	TASEEL	Relative total grain weight	JHI-Hv50k-2016-254310	4	539188378	9.4011e-06	5.02682
	GAPIT	Relative total grain weight	BOPA1_2955-452	4	552300974	0.00094761	3.02337
	TASEEL	Relative total grain weight	BOPA1_2955-452	4	552300974	2.367e-05	4.6258
	FARMCPU	Relative total grain weight	BOPA1_2955-452	4	552300974	9.43393e-05	4.02531
	GAPIT	Relative total grain weight	JHI-Hv50k-2016-338274	5	542980002	0.000309057	3.50996
	TASEEL	Relative total grain weight	JHI-Hv50k-2016-338274	5	542980002	0.00060583	3.21765
	GAPIT	Relative total grain weight	BOPA2_12_10333	5	554416618	0.000342342	3.46554
	TASEEL	Relative total grain weight	BOPA2_12_10333	5	554416618	0.00010932	3.9613
	FARMCPU	Relative total grain weight	BOPA2_12_10333	5	554416618	0.000172823	3.7624
	GAPIT	Relative total grain weight	BOPA2_12_30646	7	109297355	0.000195587	3.70866
	FARMCPU	Relative total grain weight	BOPA2_12_30646	7	109297355	3.44197e-10	9.46319
	GAPIT	Relative plant height	JHI-Hv50k-2016-8128	1	7210122	0.000240527	3.61884
	TASSEL	Relative plant height	JHI-Hv50k-2016-8128	1	7210122	0.00040119	3.39665
	GAPIT	Relative plant height	BOPA2_12_21049	2	31329721	3.28684e-05	4.48322
	TASSEL	Relative plant height	BOPA2_12_21049	2	31329721	3.4827e-05	4.45808
	FARMCPU	Relative plant height	BOPA2_12_21049	2	31329721	0.000664033	3.17781
	GAPIT	Relative plant height	BOPA2_12_30200	2	608973258	0.000285458	3.54446
	TASSEL	Relative plant height	BOPA2_12_30200	2	608973258	0.00028431	3.54621
	GAPIT	Relative plant height	BOPA2_12_31238	3	573140659	0.000147782	3.83038
	TASSEL	Relative plant height	BOPA2_12_31238	3	573140659	0.00079284	3.10081
	GAPIT	Relative plant height	JHI-Hv50k-2016-205631	3	573141427	0.000159405	3.7975
	TASSEL	Relative plant height	JHI-Hv50k-2016-205631	3	573141427	0.00086489	3.06304
	GAPIT	Relative plant height	JHI-Hv50k-2016-205612	3	573144699	4.75565e-05	4.32279
	TASSEL	Relative plant height	JHI-Hv50k-2016-205612	3	573144699	0.00026474	3.57718
	GAPIT	Relative plant height	BOPA1_2955-452	4	552300974	9.33556e-05	4.02986
	TASSEL	Relative plant height	BOPA1_2955-452	4	552300974	0.00049322	3.30696
	GAPIT	Relative plant height	SCRI_RS_239653	5	594814299	0.000793951	3.10021
	FARMCPU	Relative plant height	SCRI_RS_239653	5	594814299	0.000173704	3.76019
	GAPIT	Relative plant height	JHI-Hv50k-2016-436645	7	310014	7.78325e-05	4.10884
	TASSEL	Relative plant height	JHI-Hv50k-2016-436645	7	310014	7.5187e-05	4.12386
	GAPIT	Relative plant height	JHI-Hv50k-2016-436561	7	340559	7.78325e-05	4.10884
	TASSEL	Relative plant height	JHI-Hv50k-2016-436561	7	340559	7.5187e-05	4.12386
	GAPIT	Relative plant height	JHI-Hv50k-2016-436699	7	464701	8.97565e-05	4.04693
	TASSEL	Relative plant height	JHI-Hv50k-2016-436699	7	464701	0.00038673	3.41259
	GAPIT	Relative plant height	JHI-Hv50k-2016-435708	7	1402273	1.50284e-05	4.82309
	TASSEL	Relative plant height	JHI-Hv50k-2016-435708	7	1402273	7.4162e-05	4.12982
	FARMCPU	Relative plant height	JHI-Hv50k-2016-435708	7	1402273	1.06672e-06	5.97195
	TASSEL	Relative number of ears per plant	JHI-Hv50k-2016-17036	1	28473171	0.00054109	3.26673
	FARMCPU	Relative number of ears per plant	JHI-Hv50k-2016-17036	1	28473171	1.15775e-05	4.93638
	GAPIT	Relative number of ears per plant	JHI-Hv50k-2016-123144	2	631278948	0.000180915	3.74253
	TASSEL	Relative number of ears per plant	JHI-Hv50k-2016-123144	2	631278948	0.00084813	3.07154
	FARMCPU	Relative number of ears per plant	JHI-Hv50k-2016-123144	2	631278948	2.68337e-06	5.57132
	GAPIT	Relative number of ears per plant	JHI-Hv50k-2016-142550	2	666139797	6.4289e-05	4.19186
	TASSEL	Relative number of ears per plant	JHI-Hv50k-2016-142550	2	666139797	0.00010476	3.9798
	FARMCPU	Relative number of ears per plant	JHI-Hv50k-2016-142550	2	666139797	1.71303e-07	6.76624
	GAPIT	Relative number of ears per plant	JHI-Hv50k-2016-287969	5	30080535	0.000352396	3.45297
	FARMCPU	Relative number of ears per plant	JHI-Hv50k-2016-287969	5	30080535	3.49928e-07	6.45602
	GAPIT	Relative number of ears per plant	JHI-Hv50k-2016-439186	7	3871884	0.000644423	3.19083
	TASSEL	Relative number of ears per plant	JHI-Hv50k-2016-439186	7	3871884	0.00094136	3.02624
	GAPIT	Relative number of ears per plant	JHI-Hv50k-2016-474211	7	114191572	0.000593207	3.22679
	FARMCPU	Relative number of ears per plant	JHI-Hv50k-2016-474211	7	114191572	6.02515e-06	5.22003
	GAPIT	Relative thousand grain weight	SCRI_RS_160256	3	388881300	0.000330708	3.48056
	TASSEL	Relative thousand grain weight	SCRI_RS_160256	3	388881300	0.00096152	3.01704
	GAPIT	Relative thousand grain weight	JHI-Hv50k-2016-202912	3	562758917	0.00090043	3.04555
	FARMCPU	Relative thousand grain weight	JHI-Hv50k-2016-202912	3	562758917	1.55037e-05	4.80956
	GAPIT	Relative thousand grain weight	JHI-Hv50k-2016-274787	4	620608149	0.000339566	3.46908
	TASSEL	Relative thousand grain weight	JHI-Hv50k-2016-274787	4	620608149	0.00033848	3.47047
	GAPIT	Relative thousand grain weight	JHI-Hv50k-2016-383188	6	34612661	8.87345e-05	4.05191
	TASSEL	Relative thousand grain weight	JHI-Hv50k-2016-383188	6	34612661	0.00041864	3.37816
	GAPIT	Relative thousand grain weight	JHI-Hv50k-2016-383530	6	35335863	0.000207317	3.68336
	TASSEL	Relative thousand grain weight	JHI-Hv50k-2016-383530	6	35335863	0.00088678	3.05218
	GAPIT	Relative thousand grain weight	JHI-Hv50k-2016-383529	6	35336764	0.000207317	3.68336
	TASSEL	Relative thousand grain weight	JHI-Hv50k-2016-383529	6	35336764	0.00088678	3.05218
	GAPIT	Relative thousand grain weight	JHI-Hv50k-2016-436917	7	745349	0.000193875	3.71248
	TASSEL	Relative thousand grain weight	JHI-Hv50k-2016-436917	7	745349	0.00038959	3.40939
	GAPIT	Relative thousand grain weight	JHI-Hv50k-2016-435708	7	1402273	4.81629e-06	5.31729
	TASSEL	Relative thousand grain weight	JHI-Hv50k-2016-435708	7	1402273	1.7333e-05	4.76113
	FARMCPU	Relative thousand grain weight	JHI-Hv50k-2016-435708	7	1402273	8.70144e-09	8.06041
	GAPIT	Relative thousand grain weight	JHI-Hv50k-2016-439043	7	3714226	0.000439322	3.35722
	TASSEL	Relative thousand grain weight	JHI-Hv50k-2016-439043	7	3714226	0.00045432	3.34264
	GAPIT	Relative thousand grain weight	JHI-Hv50k-2016-518177	7	631725622	0.000562952	3.24953
	FARMCPU	Relative thousand grain weight	JHI-Hv50k-2016-518177	7	631725622	5.33997e-05	4.27246
